# Supplementary material
Source: PubMed Central journal article supplement (PMC5893355)
Supplement: NIHMS935630-supplement-supplement_1.pdf [file NIHMS935630-supplement-supplement_1.pdf]

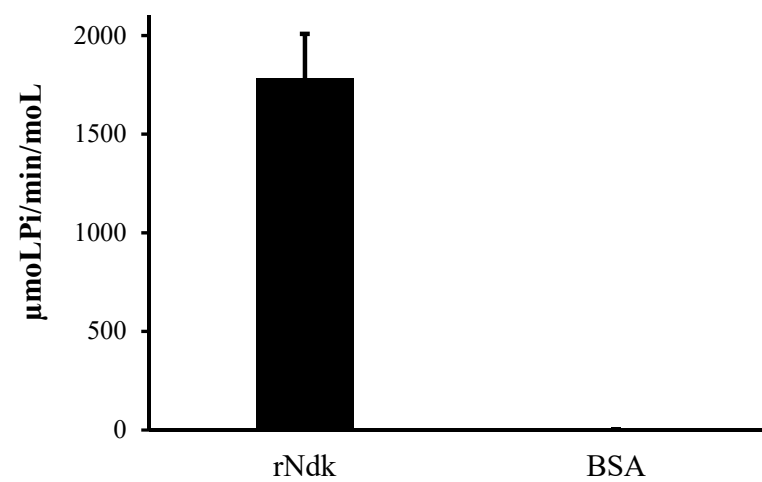

**Supplementary Figure 1. GTPase activity of Recombinant His-tagged Ndk from *P. gingivalis* ATCC 33277.** GTPase activity of rNdk was assessed using a GTPase activity kit (Innova Biosciences). Bovine serum albumin was used as a negative control for GTPase activity. Bar represents the Mean +/- SD

Protein Threshold: 99.9% | Min # Peptides: 5 | Peptide Threshold: 0%

Display Options: Total Unique Peptide Count | Req Mods: No Filter | Search:

**Probability Legend:**  
 over 95%  
 80% to 94%  
 50% to 79%  
 20% to 49%  
 0% to 19%

**Bio View:**  
 14 Proteins in 11 Clusters

| #   | Visible?                            | Starred?                            | Accession Number                                                                              | Molecular Weight | Protein Grouping Ambiguity | 1  | 2  | 3  | bsa |
|-----|-------------------------------------|-------------------------------------|-----------------------------------------------------------------------------------------------|------------------|----------------------------|----|----|----|-----|
| 1   | <input checked="" type="checkbox"/> | <input checked="" type="checkbox"/> | Cluster of Tax_Id=9606 Gene_Symbol=KRT1 Keratin, type II cytoskeletal 1 (IP... IPI:IPI0022... | ?                | ★                          | 43 | 32 | 43 |     |
| 1.1 | <input checked="" type="checkbox"/> | <input checked="" type="checkbox"/> | Tax_Id=9606 Gene_Symbol=KRT1 Keratin, type II cytoskeletal 1 IPI:IPI0022...                   | ?                | ★                          | 28 | 17 | 27 |     |
| 1.2 | <input checked="" type="checkbox"/> | <input checked="" type="checkbox"/> | Tax_Id=9606 Gene_Symbol=KRT2 Keratin, type II cytoskeletal 2 epidermal IPI:IPI0002...         | ?                | ★                          | 18 | 18 | 19 |     |
| 2   | <input checked="" type="checkbox"/> | <input checked="" type="checkbox"/> | Cluster of Tax_Id=9606 Gene_Symbol=KRT10 Keratin, type I cytoskeletal 10 (L... IPI:IPI0000... | ?                | ★                          | 21 | 19 | 24 |     |
| 2.1 | <input checked="" type="checkbox"/> | <input checked="" type="checkbox"/> | Tax_Id=9606 Gene_Symbol=KRT10 Keratin, type I cytoskeletal 10 IPI:IPI0000...                  | ?                | ★                          | 21 | 19 | 21 |     |
| 2.2 | <input checked="" type="checkbox"/> | <input checked="" type="checkbox"/> | Tax_Id=9606 Gene_Symbol=KRT14 Keratin, type I cytoskeletal 14 IPI:IPI0038...                  | ?                | ★                          |    |    | 6  |     |
| 3   | <input checked="" type="checkbox"/> | <input checked="" type="checkbox"/> | Tax_Id=9606 Gene_Symbol=KRT9 Keratin, type I cytoskeletal 9 IPI:IPI0001...                    | ?                | ★                          | 14 | 12 | 20 |     |
| 4   | <input checked="" type="checkbox"/> | <input checked="" type="checkbox"/> | Cluster of Tax_Id=9606 Gene_Symbol=ANXA8L2;ANXA8L1;ANXA8 cDNA FLJ5631... IPI:IPI0087...       | ?                | ★                          | 17 |    |    |     |
| 4.1 | <input checked="" type="checkbox"/> | <input checked="" type="checkbox"/> | Tax_Id=9606 Gene_Symbol=ANXA8L2;ANXA8L1;ANXA8 cDNA FLJ56319, highl... IPI:IPI0087...          | ?                | ★                          | 15 |    |    |     |
| 4.2 | <input checked="" type="checkbox"/> | <input checked="" type="checkbox"/> | Tax_Id=9606 Gene_Symbol=- cDNA FLJ54151, moderately similar to Annexi... IPI:IPI0091...       | ?                | ★                          | 12 |    |    |     |
| 5   | <input checked="" type="checkbox"/> | <input checked="" type="checkbox"/> | Tax_Id=9606 Gene_Symbol=CBR1 Carbonyl reductase [NADPH] 1 IPI:IPI0029...                      | ?                |                            |    | 10 |    |     |
| 6   | <input checked="" type="checkbox"/> | <input checked="" type="checkbox"/> | Serum albumin IPI01028455                                                                     | 69 kDa           | ★                          |    |    |    | 27  |
| 7   | <input checked="" type="checkbox"/> | <input checked="" type="checkbox"/> | Tax_Id=9606 Gene_Symbol=HSPB1 Heat shock protein beta-1 IPI:IPI0002...                        | ?                |                            |    |    | 12 |     |
| 8   | <input checked="" type="checkbox"/> | <input checked="" type="checkbox"/> | Tax_Id=9606 Gene_Symbol=HRNR Hornerin IPI:IPI0039...                                          | ?                |                            |    | 6  | 5  |     |
| 9   | <input checked="" type="checkbox"/> | <input checked="" type="checkbox"/> | Tax_Id=9606 Gene_Symbol=KRT5 Keratin, type II cytoskeletal 5 IPI:IPI0000...                   | ?                | ★                          | 9  | 7  | 6  |     |
| 10  | <input checked="" type="checkbox"/> | <input checked="" type="checkbox"/> | Tax_Id=9606 Gene_Symbol=ANXA3 Annexin A3 IPI:IPI0002...                                       | ?                |                            | 9  |    |    |     |
| 11  | <input checked="" type="checkbox"/> | <input checked="" type="checkbox"/> | Uncharacterized protein IPI00708398                                                           | 70 kDa           | ★                          |    |    |    | 26  |

**Supplementary Figure 2. Identification of HSP27 (HSPB1) as an interactor with *P. gingivalis* Ndk using LC-MS/MS.** Mass Spectrometry Data Analysis using Scaffold Proteome Software showing results representing 95% or higher specificity and over 99.9% threshold of detection, at a setting of no less than 5 matching peptides for each detected protein. Data analysis revealed several peptide hits for cytoskeletal/structural molecules and a metabolic enzyme, however we focused our investigations on HSPB1 (highlighted in blue), more commonly called HSP27 as an important host signaling and stress response molecule.

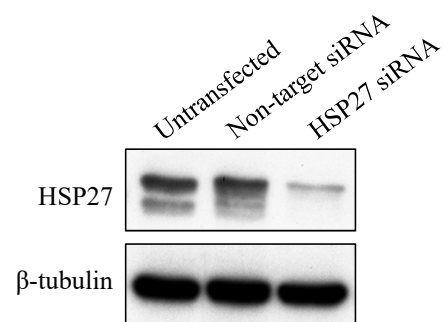

**Supplementary Figure 3. HSP27 downregulated by specific siRNA in primary GECs.** Western blot confirmation of decreased HSP27 (58% reduction as determined by NIH Image J analysis) in primary GECs after transfection with HSP27 siRNA [100nM]. Non-target siRNA [100nM] had no effect on HSP27.

## Supplementary Figure Legends

**Supplementary Figure 1.** GTPase activity of Recombinant His-tagged Ndk from *P. gingivalis* ATCC 33277. GTPase activity of rNdk was assessed using a GTPase activity kit (Innova Biosciences). Bovine serum albumin was used as a negative control for GTPase activity. Bar represents the Mean +/- SD

**Supplementary Figure 2.** Identification of HSP27 (HSPB1) as an interactor with *P. gingivalis* Ndk using LC-MS/MS. Mass Spectrometry Data Analysis using Scaffold Proteome Software showing results representing 95% or higher specificity and over 99.9% threshold of detection, at a setting of no less than 5 matching peptides for each detected protein. Data analysis revealed several peptide hits for cytoskeletal/structural molecules and a metabolic enzyme, however we focused our investigations on HSPB1 (highlighted in blue), more commonly called HSP27 as an important host signaling and stress response molecule.

**Supplementary Figure 3.** HSP27 downregulated by specific siRNA in primary GECs. Western blot confirmation of decreased HSP27 (58% reduction as determined by NIH Image J analysis) in primary GECs after transfection with HSP27 siRNA [100nM]. Non-target siRNA [100nM] had no effect on HSP27.
